# Supplementary material
Source: Springer Nature journal article supplement (https://www.springerprofessional.de/resource/supplementary/13173_2013_9_MOESM10_ESM.pdf/11897010)

Average of contents without keywords

0.50

0.45

0.40

2004/4

2004/5

2004/6

2004/7

2004/8

2004/9

Months

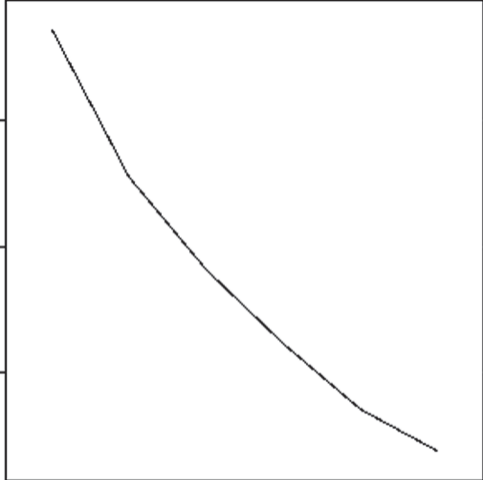

Supplement: MOESM10 [file 11897010]
